# Supplementary material for: Cooperative proton conduction in sulfonated and phosphonated hybrid random copolymers
Source: Royal Society of Chemistry journal article supplement (doi:10.1039/d0ta07732a), 2020-01-01
Supplement: d0ta07732a1.pdf [file d0ta07732a1.pdf]

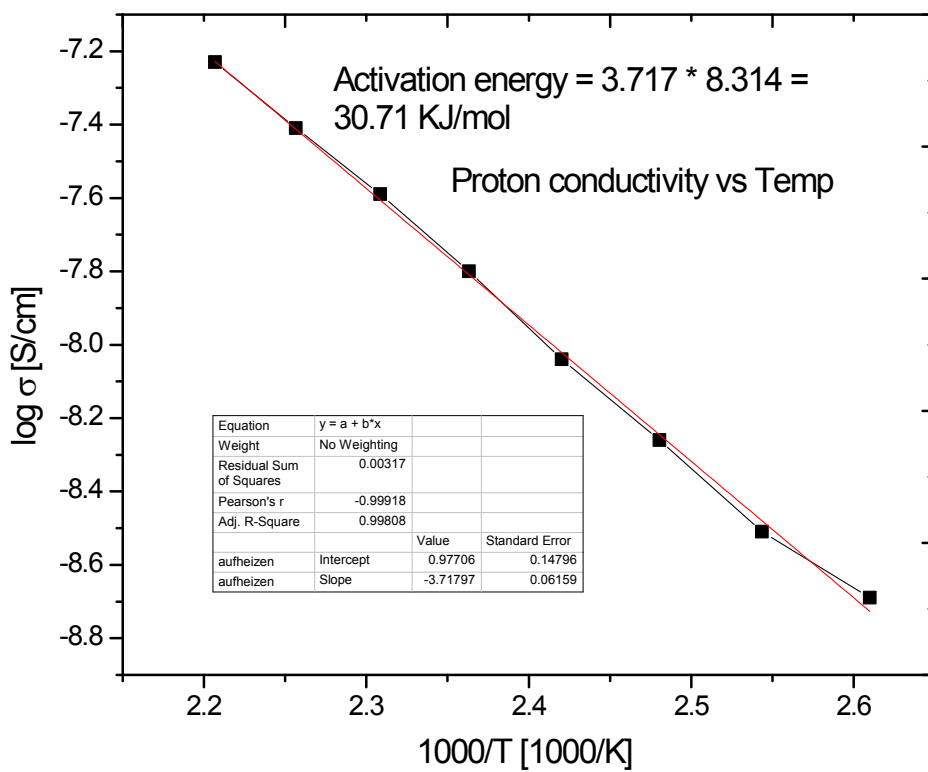

**SI1.** Anhydrous proton conductivity Vs temperature plot showing Arrhenius behavior from which  $E_a$  (activation energy) was calculated.

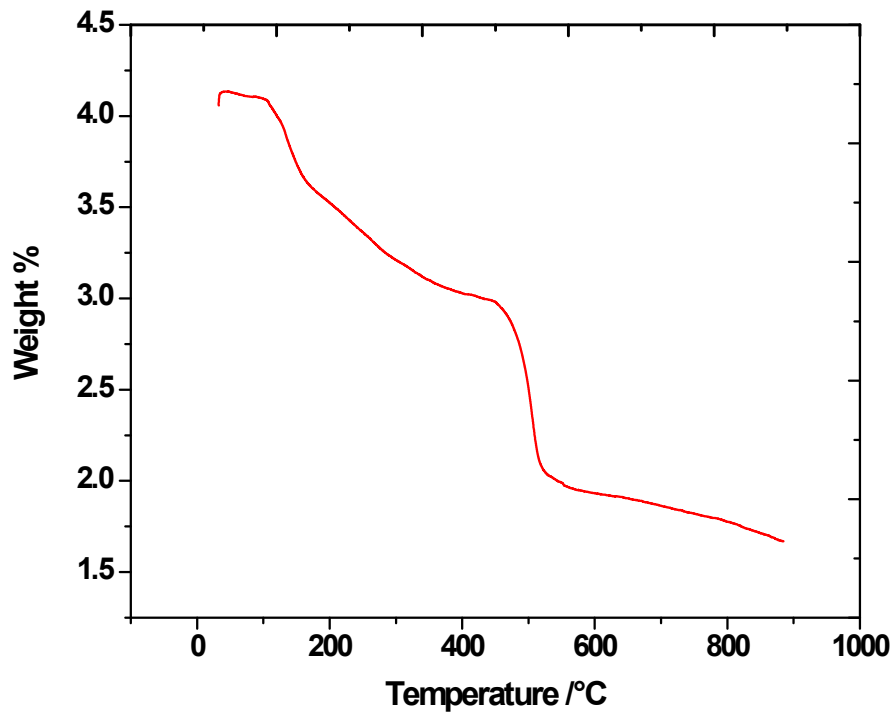

**SI2.** TGA (thermogravimetric analysis) with early weight loss at <math><180\text{ }^\circ\text{C}</math> demonstrating the loss of water molecules due to condensation process (anhydride formation) of phosphonic acid groups.
